# Supplementary material for: Dynamics of the Force of Infection: Insights from Echinococcus multilocularis Infection in Foxes
Source: PLoS Negl Trop Dis. 2014 Mar 20;8(3):e2731. doi: 10.1371/journal.pntd.0002731 (PMC3961194; doi:10.1371/journal.pntd.0002731)
Supplement: Data S1 — File containing original data. (XLS) [file pntd.0002731.s001.xls]

## Sheet: Sheet1
InfStatus	Zone	age_days
1	urban	294
0	border	307
0	border	307
1	border	309
1	periurban	311
0	periurban	311
1	border	313
1	periurban	313
1	urban	315
0	urban	315
1	periurban	318
0	periurban	318
1	periurban	319
1	periurban	320
1	border	322
1	periurban	326
0	periurban	326
1	periurban	331
0	periurban	331
1	periurban	332
1	periurban	332
0	periurban	332
1	periurban	333
1	periurban	333
1	border	355
0	urban	47
0	urban	47
0	urban	47
0	urban	52
0	urban	53
0	urban	58
0	urban	61
0	urban	80
0	periurban	87
0	urban	87
0	urban	91
0	urban	99
0	urban	99
1	urban	101
0	urban	101
0	border	103
0	urban	107
0	urban	110
0	border	113
0	urban	114
1	border	115
1	urban	124
0	urban	124
0	urban	124
0	urban	128
0	border	131
0	urban	132
0	urban	135
1	urban	159
1	urban	174
1	border	179
0	urban	200
0	urban	200
1	urban	215
0	border	215
1	border	216
0	urban	220
0	border	221
1	border	226
1	periurban	238
0	periurban	238
1	periurban	240
1	periurban	240
1	periurban	241
1	border	247
1	periurban	248
1	urban	248
0	periurban	248
1	periurban	250
1	periurban	250
0	border	250
1	periurban	252
1	border	271
1	border	280
1	border	280
1	periurban	282
1	periurban	282
1	periurban	283
0	periurban	287
1	border	289
1	periurban	290
1	periurban	291
1	periurban	294
1	periurban	294
0	border	310
1	border	314
1	periurban	320
0	border	97
0	border	102
1	periurban	106
0	urban	115
0	urban	131
0	border	177
0	border	188
1	border	194
0	urban	195
0	urban	198
0	border	203
1	urban	207
0	border	210
1	urban	216
0	border	216
0	urban	217
1	periurban	218
1	border	221
0	periurban	223
0	border	226
0	border	227
0	urban	237
1	border	240
0	urban	240
0	urban	245
1	periurban	246
1	periurban	251
0	periurban	251
0	urban	252
1	periurban	256
1	periurban	259
0	border	265
0	periurban	270
1	border	281
1	urban	286
0	urban	286
0	urban	286
1	urban	290
0	periurban	294
1	border	295
1	periurban	296
1	periurban	297
0	urban	297
0	urban	297
1	border	298
1	periurban	300
1	periurban	300
1	border	302
1	periurban	304
0	periurban	304
1	periurban	307
1	periurban	307
0	urban	307
1	periurban	308
1	periurban	308
0	periurban	308
0	border	309
1	urban	310
1	border	311
0	periurban	311
1	urban	312
0	urban	314
1	periurban	315
1	periurban	316
1	periurban	316
1	periurban	316
0	periurban	316
0	urban	319
0	border	324
1	periurban	330
1	periurban	331
0	periurban	331
0	urban	333
0	urban	333
0	urban	354
0	#N/A	364
0	border	35
0	border	35
0	urban	75
0	urban	78
0	border	82
0	border	83
0	urban	89
0	periurban	92
0	border	97
0	urban	103
0	border	107
0	urban	109
0	border	119
0	urban	126
0	urban	126
1	border	127
0	border	130
0	border	140
0	urban	140
0	urban	146
0	urban	150
0	border	152
0	urban	154
0	urban	159
0	urban	160
1	urban	167
0	border	170
0	urban	194
1	urban	196
0	border	200
0	periurban	208
1	border	225
1	periurban	236
0	periurban	243
0	urban	244
0	periurban	245
1	border	250
1	periurban	251
0	periurban	251
0	urban	256
0	periurban	258
0	periurban	258
1	periurban	264
1	periurban	264
1	periurban	266
1	periurban	271
0	urban	281
0	urban	287
0	periurban	292
1	periurban	294
1	urban	299
0	periurban	299
0	border	299
1	periurban	301
0	periurban	301
1	periurban	332
1	periurban	332
1	border	334
1	border	349
0	urban	350
0	periurban	360
0	border	367
1	border	48
0	border	54
0	border	66
0	border	67
1	border	79
0	urban	79
0	border	85
0	border	86
0	border	87
0	border	88
0	border	90
0	urban	90
1	border	91
0	border	92
0	border	92
0	urban	92
0	urban	94
1	border	97
0	border	97
1	#N/A	98
0	urban	98
0	border	99
0	periurban	102
0	periurban	102
0	urban	103
0	periurban	105
0	urban	105
1	periurban	106
0	urban	108
0	border	111
0	urban	116
0	periurban	119
0	border	120
0	urban	120
0	urban	126
1	border	131
0	urban	142
0	urban	144
0	border	144
1	border	146
0	urban	146
0	border	147
1	border	148
0	border	149
1	periurban	153
0	periurban	155
0	periurban	159
0	urban	159
0	border	160
0	border	166
1	border	173
0	urban	176
0	urban	183
0	#N/A	190
1	periurban	193
0	#N/A	194
0	border	203
0	border	211
0	border	214
1	urban	225
1	border	231
0	border	231
0	urban	238
0	border	238
0	border	239
0	urban	246
0	border	253
0	periurban	256
0	border	259
0	border	261
1	border	276
1	urban	277
0	border	277
1	urban	279
1	periurban	280
0	border	280
1	border	281
1	border	281
0	border	284
1	border	300
1	border	300
0	urban	314
0	border	315
0	periurban	333
1	periurban	671
0	periurban	675
1	periurban	677
1	border	680
0	periurban	683
0	border	705
0	border	381
0	urban	413
0	urban	413
1	periurban	457
0	urban	477
0	urban	480
0	urban	485
0	urban	495
0	urban	523
1	periurban	527
0	border	546
1	border	569
1	periurban	604
1	periurban	614
1	periurban	640
0	border	644
1	periurban	655
1	periurban	656
1	periurban	661
0	border	673
1	urban	680
0	urban	562
1	periurban	574
0	border	574
0	periurban	583
0	urban	602
0	border	615
1	periurban	627
1	periurban	669
1	border	669
0	urban	675
1	periurban	676
1	periurban	677
1	periurban	677
0	border	677
0	periurban	677
0	border	678
1	border	679
1	periurban	680
1	periurban	681
0	periurban	683
0	urban	690
1	border	698
0	urban	710
1	border	385
0	border	427
0	urban	457
0	border	476
0	border	504
0	urban	533
0	urban	563
0	periurban	590
1	urban	598
0	periurban	601
1	periurban	603
1	border	604
1	periurban	608
1	periurban	616
1	periurban	616
1	periurban	622
0	periurban	622
1	periurban	623
0	periurban	623
0	periurban	651
1	periurban	657
1	periurban	659
1	periurban	659
1	periurban	660
1	periurban	666
1	periurban	666
0	urban	696
0	urban	709
0	border	441
1	border	443
0	border	454
0	border	455
0	border	463
1	periurban	477
1	border	485
1	border	528
0	border	548
0	border	603
1	border	628
0	border	642
1	border	652
0	border	656
1	border	659
1	periurban	666
0	border	671
0	periurban	682
1	border	689
1	border	693
1	border	1031
1	periurban	1035
0	periurban	1035
1	periurban	1036
1	border	1037
0	periurban	1040
0	periurban	1040
0	border	1051
0	urban	762
0	urban	850
1	border	875
1	periurban	1020
1	periurban	1021
1	periurban	1048
0	border	834
1	periurban	946
1	periurban	954
1	periurban	982
0	border	989
1	border	991
1	periurban	993
0	periurban	1025
1	border	1036
0	border	1040
0	urban	1043
0	periurban	1046
1	periurban	1048
0	urban	870
0	urban	878
0	urban	885
1	periurban	973
0	border	986
0	periurban	1016
0	periurban	1025
0	border	807
0	urban	814
0	urban	820
0	border	862
0	border	874
0	border	875
1	border	936
1	border	936
0	border	972
1	border	982
0	border	1005
0	border	1007
1	border	1028
1	urban	1032
0	border	1036
0	border	1056
0	periurban	1405
0	border	1410
1	periurban	1331
1	periurban	1334
1	periurban	1336
1	periurban	1345
1	periurban	1387
0	urban	1330
0	urban	1332
0	periurban	1349
1	border	1398
1	periurban	1401
1	periurban	1404
0	border	1249
0	border	1264
0	urban	1376
0	periurban	1382
0	periurban	1397
0	periurban	1397
0	border	1419
0	urban	1427
0	border	1107
0	border	1126
1	border	1185
0	border	1186
1	border	1193
0	border	1360
0	border	1387
1	border	1390
1	periurban	1393
1	periurban	1396
1	border	1404
0	periurban	1771
0	urban	1514
0	border	1555
0	border	1605
0	urban	1763
1	border	1649
1	border	1660
1	border	1750
1	periurban	1768
1	border	1770
0	periurban	1772
0	periurban	1699
0	urban	1756
1	periurban	1760
0	periurban	1600
0	border	1703
0	border	1794
0	border	2068
1	periurban	2079
1	periurban	2107
0	border	2021
0	border	2084
0	periurban	2141
0	border	2120
0	urban	2133
0	urban	1934
1	border	1996
0	periurban	2069
0	urban	2075
0	border	2454
0	urban	2431
0	border	2212
1	border	2391
0	urban	2508
1	border	2577
0	urban	2731
0	urban	2795
0	periurban	2814
0	urban	2842
1	border	2645
1	border	3256
