# Supplementary material for: Dynamics of the Force of Infection: Insights from Echinococcus multilocularis Infection in Foxes
Source: PubMed Central journal article supplement (PMC3961194; doi:10.1371/journal.pntd.0002731), 2014-03-20
Supplement: pntd.0002731.s003.pdf [file pntd.0002731.s003.pdf]

## Supporting Information Text S2

### Results using an uninformative prior for $\mu$

This is similar to Table 1 in the main manuscript but for the uninformative prior for  $\mu$ .

| Model | Description                                                                                                                                                                   | Prior for $\mu$       | Log marginal likelihood         |
|-------|-------------------------------------------------------------------------------------------------------------------------------------------------------------------------------|-----------------------|---------------------------------|
| 1-C   | no immunity ( $\alpha = 0$ )<br>Constant FOI:<br>$\log \beta(a) = \beta_0$                                                                                                    | $N(0.0, \sqrt{1000})$ | -303.2 ( $\Delta_{ML} = 16.4$ ) |
| 1-L   | no immunity ( $\alpha = 0$ )<br>Linear FOI:<br>$\log \beta(a) = \beta_0 + \beta_1 a$                                                                                          | $N(0.0, \sqrt{1000})$ | -306.4 ( $\Delta_{ML} = 22.8$ ) |
| 1-Q   | no immunity ( $\alpha = 0$ )<br>Quadratic FOI:<br>$\log \beta(a) = \beta_0 + \beta_1 a + \beta_2 a^2$                                                                         | $N(0.0, \sqrt{1000})$ | -300.3 ( $\Delta_{ML} = 10.6$ ) |
| 1-P   | no immunity ( $\alpha = 0$ )<br>Periodic FOI:<br>$\log\{\beta(a)\} = \beta_0 + \beta_1 \sin \left\{ 2\pi \left( a - \frac{\exp(a_s)}{1+\exp(a_s)} \right) \right\}$           | $N(0.0, \sqrt{1000})$ | -295.0 ( $\Delta_{ML} = 0.0$ )  |
| 2     | lifelong immunity ( $\gamma = 0$ )<br>periodic FOI:<br>$\log\{\beta(a)\} = \beta_0 + \beta_1 \sin \left\{ 2\pi \left( a - \frac{\exp(a_s)}{1+\exp(a_s)} \right) \right\}$     | $N(0.0, \sqrt{1000})$ | -296.2 ( $\Delta_{ML} = 2.4$ )  |
| 3     | transient immunity ( $\gamma \neq 0$ )<br>periodic FOI:<br>$\log\{\beta(a)\} = \beta_0 + \beta_1 \sin \left\{ 2\pi \left( a - \frac{\exp(a_s)}{1+\exp(a_s)} \right) \right\}$ | $N(0.0, \sqrt{1000})$ | -297.4 ( $\Delta_{ML} = 4.8$ )  |
