# Supplementary material for: Dynamics of the Force of Infection: Insights from Echinococcus multilocularis Infection in Foxes
Source: PubMed Central journal article supplement (PMC3961194; doi:10.1371/journal.pntd.0002731), 2014-03-20
Supplement: pntd.0002731.s004.pdf [file pntd.0002731.s004.pdf]

## Supporting Information Text S3

### Modeling results for foxes of all ages

This is similar to Table 1 in the main manuscript but for the models fitting to the data from foxes of all ages.

| Model | Description                                                                                                                           | Prior for $\mu$ | Log marginal likelihood         |
|-------|---------------------------------------------------------------------------------------------------------------------------------------|-----------------|---------------------------------|
| 1-C   | no immunity ( $\alpha = 0$ )                                                                                                          | $N(1.2, 0.2)$   | -354.6 ( $\Delta_{ML} = 22.8$ ) |
|       | Constant FOI:<br>$\log \beta(a) = \beta_0$                                                                                            | $N(1.3, 0.3)$   | -354.0 ( $\Delta_{ML} = 21.6$ ) |
| 1-L   | no immunity ( $\alpha = 0$ )                                                                                                          | $N(1.2, 0.2)$   | -360.6 ( $\Delta_{ML} = 34.8$ ) |
|       | Linear FOI:<br>$\log \beta(a) = \beta_0 + \beta_1 a$                                                                                  | $N(1.3, 0.3)$   | -359.6 ( $\Delta_{ML} = 32.8$ ) |
| 1-Q   | no immunity ( $\alpha = 0$ )                                                                                                          | $N(1.2, 0.2)$   | -365.5 ( $\Delta_{ML} = 44.6$ ) |
|       | Quadratic FOI:<br>$\log \beta(a) = \beta_0 + \beta_1 a + \beta_2 a^2$                                                                 | $N(1.3, 0.3)$   | -365.1 ( $\Delta_{ML} = 43.8$ ) |
| 1-P   | no immunity ( $\alpha = 0$ )                                                                                                          | $N(1.2, 0.2)$   | -343.3 ( $\Delta_{ML} = 0.2$ )  |
|       | Periodic FOI:<br>$\log\{\beta(a)\} = \beta_0 + \beta_1 \sin \left\{ 2\pi \left( a - \frac{\exp(a_s)}{1 + \exp(a_s)} \right) \right\}$ | $N(1.3, 0.3)$   | -343.2 ( $\Delta_{ML} = 0.0$ )  |
| 2     | lifelong immunity ( $\gamma = 0$ )                                                                                                    | $N(1.2, 0.2)$   | -344.6 ( $\Delta_{ML} = 2.8$ )  |
|       | periodic FOI:<br>$\log\{\beta(a)\} = \beta_0 + \beta_1 \sin \left\{ 2\pi \left( a - \frac{\exp(a_s)}{1 + \exp(a_s)} \right) \right\}$ | $N(1.3, 0.3)$   | -344.8 ( $\Delta_{ML} = 3.2$ )  |
| 3     | transient immunity ( $\gamma \neq 0$ )                                                                                                | $N(1.2, 0.2)$   | -345.7 ( $\Delta_{ML} = 5.0$ )  |
|       | periodic FOI:<br>$\log\{\beta(a)\} = \beta_0 + \beta_1 \sin \left\{ 2\pi \left( a - \frac{\exp(a_s)}{1 + \exp(a_s)} \right) \right\}$ | $N(1.3, 0.3)$   | -349.3 ( $\Delta_{ML} = 12.2$ ) |
