# Supplementary material for: Dynamics of the Force of Infection: Insights from Echinococcus multilocularis Infection in Foxes
Source: PubMed Central journal article supplement (PMC3961194; doi:10.1371/journal.pntd.0002731), 2014-03-20
Supplement: pntd.0002731.s005.pdf [file pntd.0002731.s005.pdf]

## Supporting Information Text S4

### Estimates of the posterior modes for all the parameters in models presented in Table 1

The following table gives estimates for the parameter modes in each of the models presented in Table 1 in the main text. NA - not applicable.

| Model | Prior for $\mu$ | Posterior modes                                                                                   |
|-------|-----------------|---------------------------------------------------------------------------------------------------|
| 1-C   | $N(1.2, 0.2)$   | $\{\alpha, \beta_0, \mu, \gamma\} = \{0, 0.64, 0.79, \text{NA}\}$                                 |
|       | $N(1.3, 0.3)$   | $\{\alpha, \beta_0, \mu, \gamma\} = \{0, 0.50, 0.57, \text{NA}\}$                                 |
| 1-L   | $N(1.2, 0.2)$   | $\{\alpha, \beta_0, \beta_1, \mu, \gamma\} = \{0, 0.55, 0.23, 0.92, \text{NA}\}$                  |
|       | $N(1.3, 0.3)$   | $\{\alpha, \beta_0, \beta_1, \mu, \gamma\} = \{0, 0.46, 0.18, 0.74, \text{NA}\}$                  |
| 1-Q   | $N(1.2, 0.2)$   | $\{\alpha, \beta_0, \beta_1, \beta_2, \mu, \gamma\} = \{0, -0.02, 2.10, -0.70, 1.12, \text{NA}\}$ |
|       | $N(1.3, 0.3)$   | $\{\alpha, \beta_0, \beta_1, \beta_2, \mu, \gamma\} = \{0, -0.02, 2.09, -0.70, 1.12, \text{NA}\}$ |
| 1-P   | $N(1.2, 0.2)$   | $\{\alpha, \beta_0, \beta_1, a_s, \mu, \gamma\} = \{0, 0.72, 1.19, -0.32, 1.28, \text{NA}\}$      |
|       | $N(1.3, 0.3)$   | $\{\alpha, \beta_0, \beta_1, a_s, \mu, \gamma\} = \{0, 0.83, 1.19, -0.29, 1.42, \text{NA}\}$      |
| 2     | $N(1.2, 0.2)$   | $\{\alpha, \beta_0, \beta_1, a_s, \mu, \gamma\} = \{-5.30, 0.76, 1.19, -0.30, 1.30, 0\}$          |
|       | $N(1.3, 0.3)$   | $\{\alpha, \beta_0, \beta_1, a_s, \mu, \gamma\} = \{-4.83, 0.83, 1.20, -0.27, 1.39, 0\}$          |
| 3     | $N(1.2, 0.2)$   | $\{\alpha, \beta_0, \beta_1, a_s, \mu, \gamma\} = \{-4.56, 0.72, 1.18, -0.32, 1.28, 2.72\}$       |
|       | $N(1.3, 0.3)$   | $\{\alpha, \beta_0, \beta_1, a_s, \mu, \gamma\} = \{-6.32, 0.83, 1.19, -0.28, 1.43, 2.76\}$       |
