# Supplementary material for: Dynamics of the Force of Infection: Insights from Echinococcus multilocularis Infection in Foxes
Source: PubMed Central journal article supplement (PMC3961194; doi:10.1371/journal.pntd.0002731), 2014-03-20
Supplement: pntd.0002731.s007.pdf [file pntd.0002731.s007.pdf]

## Supporting Information Text S6

### Full marginal Posterior densities for model 1-P<sub>0</sub>

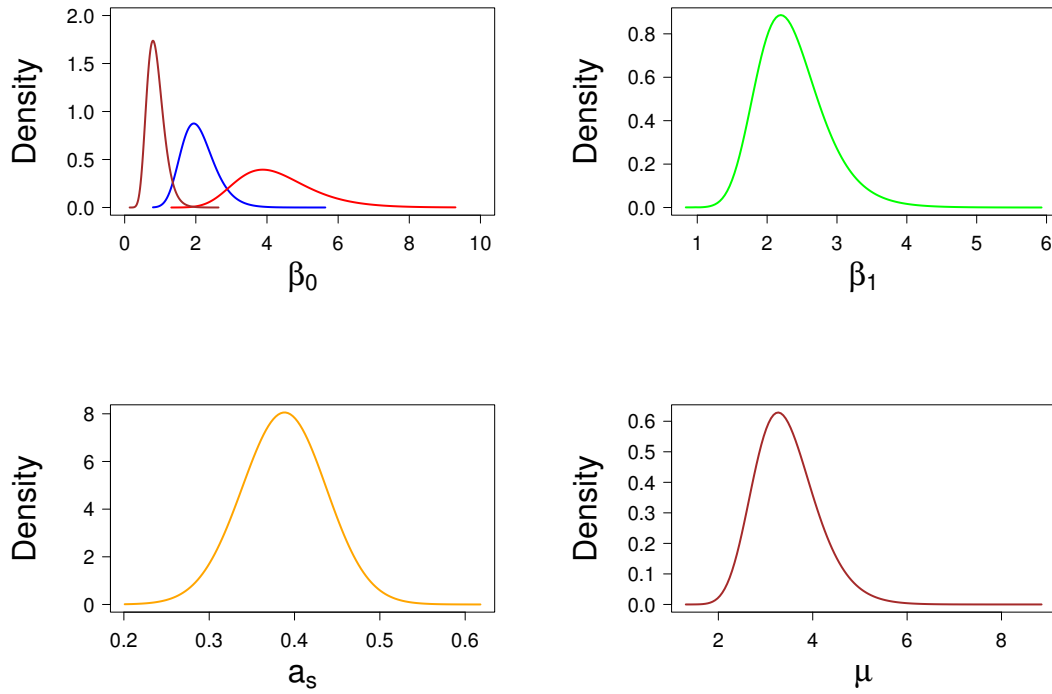

Marginal posterior densities for  $\beta_0, \beta_1, a_s$  and  $\mu$  on the real scale using the informative prior for  $\mu$  with mean=1.2 and sd=0.2. For  $\beta_0$  brown is urban, blue is border and red is periurban.
