# Supplementary material for: Dynamics of the Force of Infection: Insights from Echinococcus multilocularis Infection in Foxes
Source: PubMed Central journal article supplement (PMC3961194; doi:10.1371/journal.pntd.0002731), 2014-03-20
Supplement: pntd.0002731.s008.pdf [file pntd.0002731.s008.pdf]

## Supporting Information Text S7

### Modal prevalence estimates by habitat using Model 1-P<sub>0</sub>

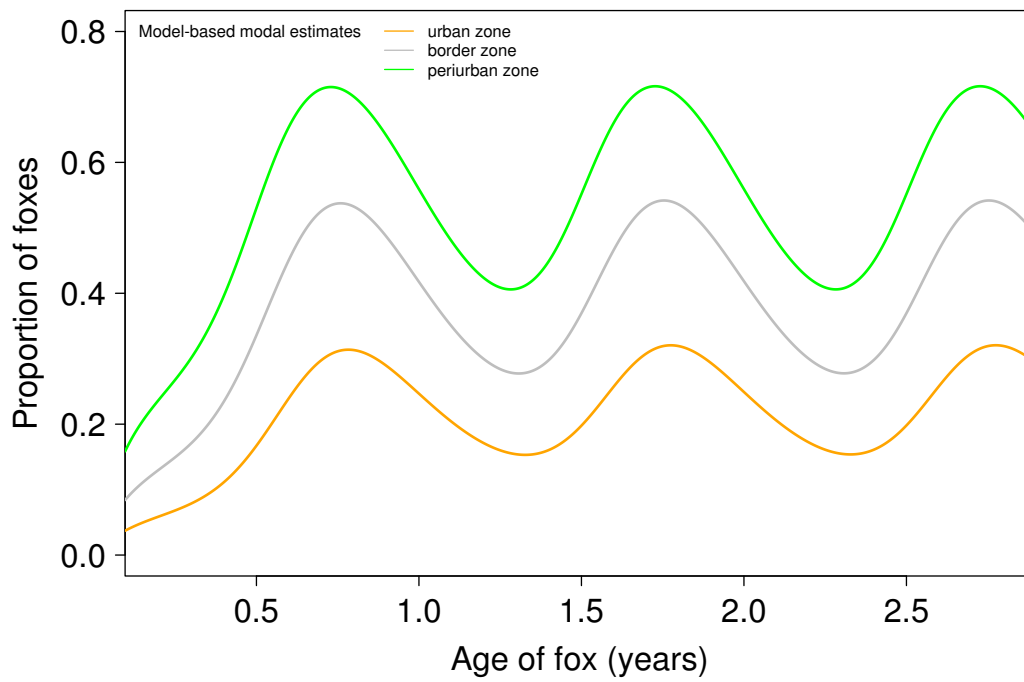

Model predicted prevalence using posterior mode estimates of all model parameters and using the informative prior for  $\mu$  with mean=1.2 and sd=0.2.
